# Supplementary material for: High Temporal Resolution Land Use Regression Models with POI Characteristics of the PM2.5 Distribution in Beijing, China
Source: MDPI journal article supplement (doi:10.3390/ijerph18116143), 2021-06-07
Supplement: s1 [file s1]

**Table S1.** PM<sub>2.5</sub> pollutant concentrations in each district of Beijing at different times.

| District  | N | Winter Working Day |       |       | Winter Non-Working Day |       |       | Summer Working Day |      |       | Summer Non-Working Day |      |       |
|-----------|---|--------------------|-------|-------|------------------------|-------|-------|--------------------|------|-------|------------------------|------|-------|
|           |   | 0:00               | 8:00  | 18:00 | 0:00                   | 8:00  | 18:00 | 0:00               | 8:00 | 18:00 | 0:00                   | 8:00 | 18:00 |
| Dongcheng | 2 | 234.5              | 139.0 | 246.5 | 326.5                  | 143.0 | 428.5 | 42.0               | 56.0 | 40.0  | 37.5                   | 50.5 | 27.5  |
| Xicheng   | 2 | 229.5              | 94.0  | 198.5 | 295.5                  | 116.5 | 391.5 | 44.0               | 62.5 | 38.5  | 38.0                   | 59.0 | 19.0  |
| Haidian   | 4 | 144.0              | 46.0  | 92.3  | 121.8                  | 112.3 | 223.3 | 45.8               | 57.8 | 41.5  | 33.5                   | 37.5 | 29.5  |
| Chaoyang  | 4 | 223.0              | 80.0  | 111.0 | 185.5                  | 106.3 | 324.5 | 38.0               | 46.0 | 36.5  | 40.0                   | 49.8 | 20.5  |
| Fengtai   | 4 | 225.0              | 92.8  | 223.3 | 285.5                  | 127.0 | 423.5 | 39.8               | 43.5 | 33.3  | 31.3                   | 42.3 | 21.0  |
| Shunyi    | 1 | 59.0               | 28.0  | 197.0 | 198.0                  | 84.0  | 139.0 | 28.0               | 31.0 | 38.0  | 33.0                   | 33.0 | 10.0  |
| Tongzhou  | 2 | 244.0              | 283.0 | 247.0 | 326.5                  | 256.5 | 510.0 | 35.0               | 65.5 | 42.5  | 26.0                   | 45.0 | 17.0  |
| Daxing    | 3 | 261.7              | 236.3 | 342.0 | 348.0                  | 351.7 | 520.3 | 35.0               | 44.7 | 24.7  | 22.3                   | 36.3 | 18.7  |
| Fangshan  | 2 | 229.0              | 93.5  | 309.0 | 273.0                  | 144.0 | 579.5 | 27.0               | 40.5 | 39.0  | 31.5                   | 30.0 | 19.5  |
| Mentougou | 1 | 47.0               | 24.0  | 12.0  | 116.0                  | 90.0  | 199.0 | 31.0               | 30.0 | 38.0  | 25.0                   | 15.0 | 24.0  |
| Changping | 2 | 18.0               | 26.0  | 22.5  | 104.0                  | 115.0 | 127.5 | 30.5               | 55.0 | 47.0  | 24.5                   | 24.0 | 41.5  |
| Pinggu    | 2 | 51.5               | 95.0  | 264.5 | 171.0                  | 224.5 | 288.0 | 27.5               | 40.0 | 42.0  | 26.5                   | 31.5 | 15.5  |
| Miyun     | 2 | 19.0               | 21.5  | 131.5 | 93.5                   | 73.0  | 107.5 | 24.0               | 30.0 | 45.0  | 27.5                   | 36.0 | 16.5  |
| Huairou   | 1 | 21.0               | 18.0  | 145.0 | 70.0                   | 83.0  | 116.0 | 22.0               | 31.0 | 46.0  | 24.0                   | 27.0 | 23.0  |
| Yanqing   | 2 | 46.0               | 50.5  | 11.5  | 140.5                  | 149.0 | 116.0 | 16.0               | 41.0 | 43.0  | 22.5                   | 27.5 | 25.0  |

**Table S2.** The largest correlation coefficients of predictors in different buffer radii.

| Predictors                         | Winter Working Day |          |          | Winter Non-Working Day |          |          | Summer Working Day |         |          | Summer Non-Working Day |          |          |
|------------------------------------|--------------------|----------|----------|------------------------|----------|----------|--------------------|---------|----------|------------------------|----------|----------|
|                                    | 0:00               | 8:00     | 18:00    | 0:00                   | 8:00     | 18:00    | 0:00               | 8:00    | 18:00    | 0:00                   | 8:00     | 18:00    |
| Arable land                        | -0.191             | 0.275    | 0.410*   | 0.228                  | 0.353*   | 0.182    | -0.449**           | -0.194  | -0.433*  | -0.378*                | -0.510** | -0.564** |
| Garden land                        | -0.585**           | -0.449** | -0.474** | -0.605**               | -0.233   | -0.583** | -0.460**           | -0.393* | 0.436**  | -0.546**               | -0.495** | -0.409*  |
| Woodland                           | -0.349*            | -0.246   | -0.189   | -0.344*                | -0.255   | -0.340*  | -0.213             | -0.280  | 0.198    | -0.294                 | -0.443** | -0.324   |
| Grassland                          | -0.581**           | -0.391*  | -0.217   | -0.474**               | -0.384*  | -0.429*  | -0.448**           | -0.355* | 0.601**  | -0.352*                | -0.409*  | -0.405*  |
| Commercial service land            | 0.469**            | 0.342*   | 0.338    | 0.444**                | 0.159    | 0.369*   | 0.608**            | 0.414*  | 0.302    | 0.491**                | 0.480**  | 0.630**  |
| Primary road                       | 0.520**            | 0.350*   | 0.175    | 0.435**                | 0.077    | 0.428*   | 0.614**            | 0.424*  | 0.527**  | 0.496**                | 0.614**  | 0.681**  |
| Secondary road                     | 0.484**            | 0.291    | 0.074    | 0.386*                 | -0.314   | 0.294    | 0.556**            | 0.497** | -0.334*  | 0.545**                | 0.653**  | 0.638**  |
| Catering services                  | 0.450**            | 0.271    | 0.011    | 0.373*                 | -0.381*  | 0.280    | 0.550**            | 0.523** | 0.385*   | 0.566**                | 0.595**  | 0.639**  |
| Scenic spots                       | 0.199              | 0.057    | -0.253   | 0.187                  | -0.255   | -0.054   | 0.414*             | 0.286   | 0.450**  | 0.566**                | 0.595**  | 0.660**  |
| Public facilities                  | 0.455**            | 0.350*   | -0.120   | 0.347*                 | 0.134    | 0.223    | 0.594**            | 0.351*  | 0.371*   | 0.572**                | 0.593**  | 0.671**  |
| Companies                          | 0.501**            | 0.343*   | 0.062    | 0.307                  | -0.076   | 0.342*   | 0.667**            | 0.473** | 0.386*   | 0.602**                | 0.594**  | 0.684**  |
| Shopping places                    | 0.518**            | 0.359*   | 0.142    | 0.475**                | -0.085   | 0.382*   | 0.529**            | 0.402*  | 0.417*   | 0.504**                | 0.663**  | 0.622**  |
| Transportation                     | 0.486**            | 0.344*   | 0.158    | 0.396*                 | -0.115   | 0.336*   | 0.667**            | 0.464** | 0.398*   | 0.551**                | 0.606**  | 0.699**  |
| Financial banks                    | 0.421*             | 0.364*   | -0.042   | 0.336*                 | -0.163   | 0.273    | 0.560**            | 0.339*  | 0.364*   | 0.582**                | 0.576**  | 0.606**  |
| Science and education places       | 0.400*             | 0.231    | -0.029   | 0.321                  | -0.139   | 0.237    | 0.658**            | 0.590** | 0.464**  | 0.591**                | 0.625**  | 0.773**  |
| Commercial and residential housing | 0.460**            | 0.242    | 0.018    | 0.352*                 | -0.148   | 0.289    | 0.649**            | 0.567** | 0.485**  | 0.592**                | 0.627**  | 0.703**  |
| Life services                      | 0.476**            | 0.333    | 0.124    | 0.453**                | -0.202   | 0.341*   | 0.570**            | 0.531** | 0.324    | 0.540**                | 0.600**  | 0.667**  |
| Sports and leisure                 | 0.380*             | 0.204    | -0.186   | 0.246                  | -0.183   | 0.220    | 0.543**            | 0.404*  | 0.410*   | 0.559**                | 0.586**  | 0.685**  |
| Medical care                       | 0.456**            | 0.288    | 0.108    | 0.451**                | -0.233   | 0.337*   | 0.620**            | 0.585** | 0.445**  | 0.543**                | 0.609**  | 0.693**  |
| Government agencies                | 0.408*             | 0.222    | 0.065    | 0.469**                | 0.022    | 0.294    | 0.574**            | 0.421*  | 0.383*   | 0.571**                | 0.608**  | 0.629**  |
| Temperature                        | 0.599**            | 0.101    | -0.342*  | 0.009                  | 0.009    | -0.204   | 0.601**            | 0.312   | -0.308   | 0.656**                | 0.141    | 0.140    |
| Relative humidity                  | 0.931**            | 0.667**  | 0.783**  | 0.805**                | 0.805**  | 0.955**  | -0.407*            | -0.238  | 0.253    | -0.158                 | 0.521**  | -0.395*  |
| Air pressure                       | 0.485**            | 0.770**  | 0.697**  | 0.683**                | 0.683**  | 0.686**  | 0.468**            | 0.146   | -0.446** | 0.162                  | 0.301    | -0.237   |
| Wind speed                         | -0.559**           | -0.238   | -0.592** | -0.192                 | -0.192   | -0.201   | 0.414*             | -0.117  | 0.074    | -0.022                 | 0.042    | 0.308    |
| Population                         | 0.511**            | 0.299    | 0.083    | 0.358*                 | -0.003   | 0.331    | 0.722**            | 0.516** | -0.034   | 0.533**                | 0.596**  | 0.241    |
| Elevation                          | -0.573**           | -0.714** | -0.704** | -0.599**               | -0.523** | -0.616** | -0.505**           | -0.222  | 0.464**  | -0.135                 | -0.204   | 0.546**  |
| Industry source                    | 0.358*             | 0.203    | 0.070    | 0.291                  | 0.065    | 0.265    | 0.256              | 0.199   | -0.358*  | 0.144                  | 0.232    | 0.467**  |

\*  $p < 0.01$ ; \*\*  $p < 0.05$ . This table only shows the maximum correlation coefficients of the same predictor. Other correlation coefficients with different buffer size are not listed.
